# Supplementary material
Source: PubMed Central journal article supplement (PMC4240991)
Supplement: rspb20141868supp1.pdf [file rspb20141868supp1.pdf]

# Comparative Brain Transcriptomic Analyses of Scouting Across Distinct Behavioural and Ecological Contexts in Honey Bees

(Supplementary material)

This supplementary material includes:

Additional methods with references

Figure S1- S5

Table S1, S3, S4, S5 \*

\*Table S2 is an Excel spreadsheets (Table S2\_GO enrichment data.xlsx) uploaded as a  
separately file.

## **Additional Methods**

### **(a) Brain dissection and RNA extraction**

Bee heads were freeze-dried at  $-80^{\circ}\text{C}$ , and then whole brains were dissected out in 100% ethanol on dry ice and stored at  $-80^{\circ}\text{C}$  [1]. RNA was isolated from whole brains using TRIzol<sup>®</sup> Reagent (Invitrogen, CA) and RNeasy<sup>®</sup> Mini Kit (Qiagen Sciences, MD). RNA extraction was carried out as per manufacturer's instructions for total RNA and for on-column DNase I treatment (Qiagen). RNA yields and purity were determined with a NanoDrop<sup>®</sup> ND-1000 UV-Vis Spectrophotometer (Thermo Fisher Scientific, DE).

### **(b) Transcriptomic analysis**

Brain dissection and RNA extraction was performed according to standard methods (detailed description in the ESM). We used a second-generation honey bee whole genome microarray, which was primarily based on the Honey Bee Genome Sequencing Consortium Official Gene Set 2.0 [2] and was previously characterized [3]. The microarray has 13,614 probes, henceforth referred to as genes. A total of 120 bees were analyzed in the study. For food scouting, 30 scouts and 30 recruits were used from three colonies, with 10 bees per behavioural group per colony. For nest scouting, 30 scouts and 30 recruits were used from two colonies, with 15 bees per behavioural group per colony. The bees were compared in a loop design [4, 5] with a total of 138 microarrays (Fig. S2). RNA was extracted from bee brains, and 500 ng per brain were amplified using amino-allyl MessageAmpII kits (Ambion/Applied Biosystems, TX). Of this amplified aRNA, 15 ug were conjugated with Cy3 or Cy5 mono NHS ester (GE Healthcare). From this conjugated aRNA, 3ug of Cy3 and 3ug of Cy5 labeled aRNA were combined and fragmented. The labeled aRNA was loaded on custom-printed microarray slides and hybridized overnight using Agilent coverslips (Agilent,

CA) in a rotating hybridization oven at 42°C. Hybridized arrays were scanned on an Axon 4000B scanner and the images analyzed using GENEPIX 6.1 software (Agilent, CA). Images were manually edited for aberrant spots.

Fluorescence intensity spots were filtered if flagged by the scanning software or if the intensity did not surpass the median intensity of the negative control spots for each channel. A Loess transformation was used to adjust the log<sub>2</sub> transformed gene expression intensities for dye effects within each microarray, and duplicated spots within the microarray elements were averaged. Gene intensities within each microarray were centralized to allow analysis across microarrays, and microarray elements with more than one missing observation were removed from the analysis.

### References:

- 1 Schulz, D. J. & Robinson, G. E. 1999 Biogenic amines and division of labor in honey bee colonies: behaviorally related changes in the antennal lobes and age-related changes in the mushroom bodies. *J. Comp. Physiol. A Neuroethol. Sens. Neural. Behav. Physiol.* **184**, 481–488.
- 2 Honey bee Genome Sequencing Consortium 2006 Insights into social insects from the genome of the honey bee *Apis mellifera*. *Nature* **443**, 931–949. (doi: 10.1038/nature05260)
- 3 Alaux, C., Le Conte, Y., Adams, H. A., Rodriguez-Zas, S., Grozinger, C. M., Sinha, S. & Robinson, G. E. 2009 Regulation of brain gene expression in honey bees by brood pheromone. *Genes Brain Behav* **8**, 309–319. (doi:10.1111/j.1601-183X.2009.00480.x)
- 4 Kerr M.K., Churchill G.A. 2001 Experimental design for gene expression microarrays. *Biostatistics* **2**, 183–201. (doi: 10.1093/biostatistics/2.2.183.)
- 5 Whitfield C.W., Cziko A.M., Robinson G.E. 2003 Gene expression profiles in the brain predict behavior in individual honey bees. *Science* **302**, 296-299. (doi: 10.1126/science.1086807)

**Figure S1.** Experimental design, with effect of role analyzed by comparing scouts with recruits, and effect of context analysed by comparing foragers (food) and nest hunters (nest).

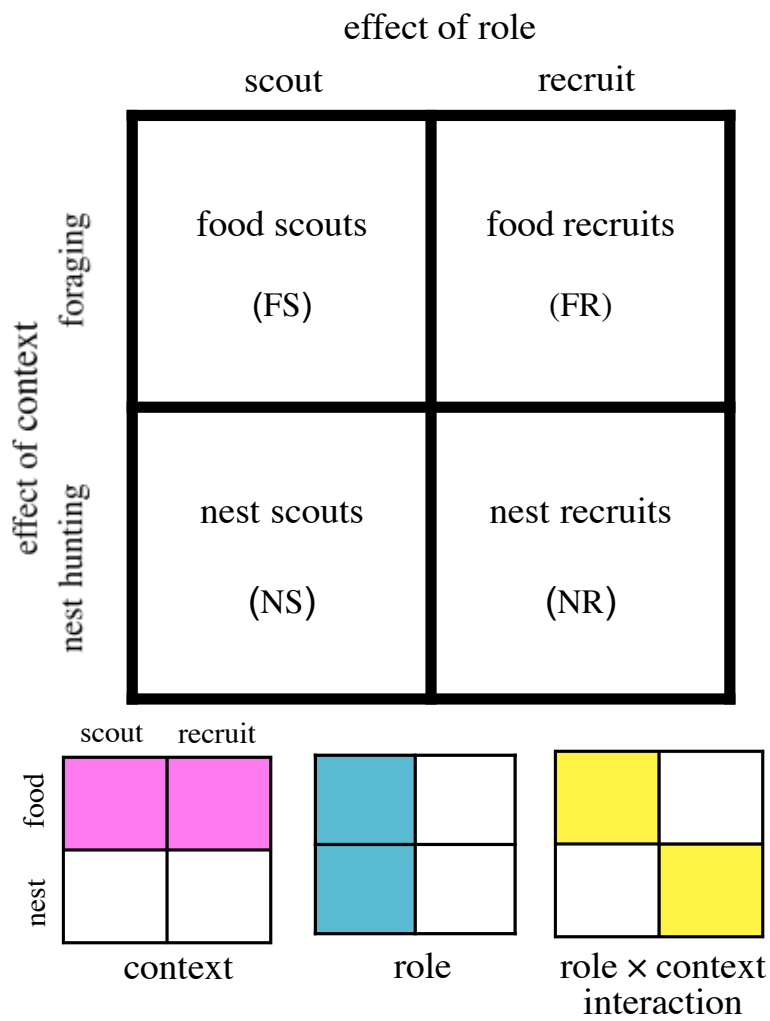

**Figure S2** Microarray loop design for the comparative brain gene expression between two scouting behaviours. FS: food scouts, FR: food recruits, NS: nest scouts, NR: nest recruits. B1-12, B1-13 and B1-14 were three colonies used to collected food scouts and recruits. B1-12 and B2-17 were two colonies used to collected nest scouts and recruits. A total of 138 arrays were used. Detailed description of sample use was in the Material and Methods section of the main text.

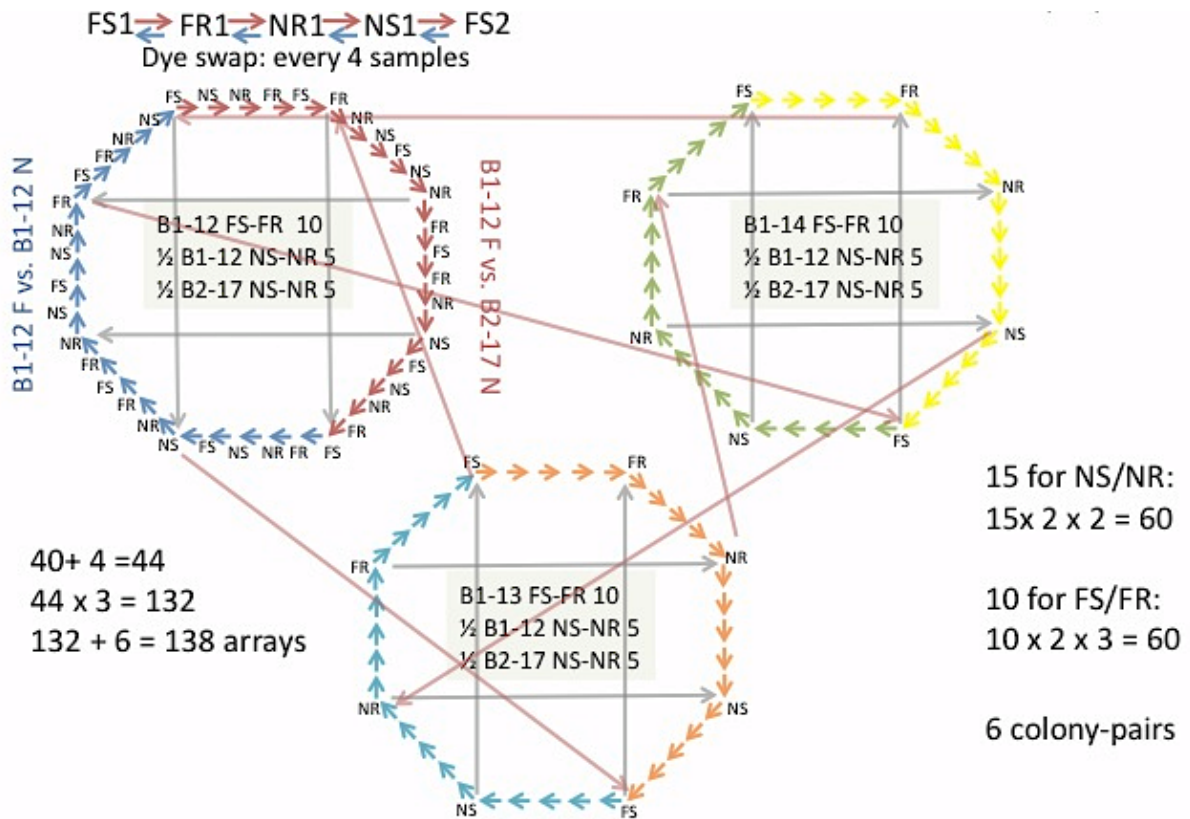

**Figure S3.** Linear Discriminant Analysis (LDA) failed to separate the four behavioural groups either by context or by role when using 5 neural signaling genes in the serotonin and tyramine systems. (a) Food scouts and food recruits. (b) Nest scouts and nest recruits. FS: food scouts (red), FR: food recruits (blue), NS: nest scouts, NR: nest recruits, with different colonies denoted as subscript 1, 2 and 3. More detailed gene information is listed in Table S1.

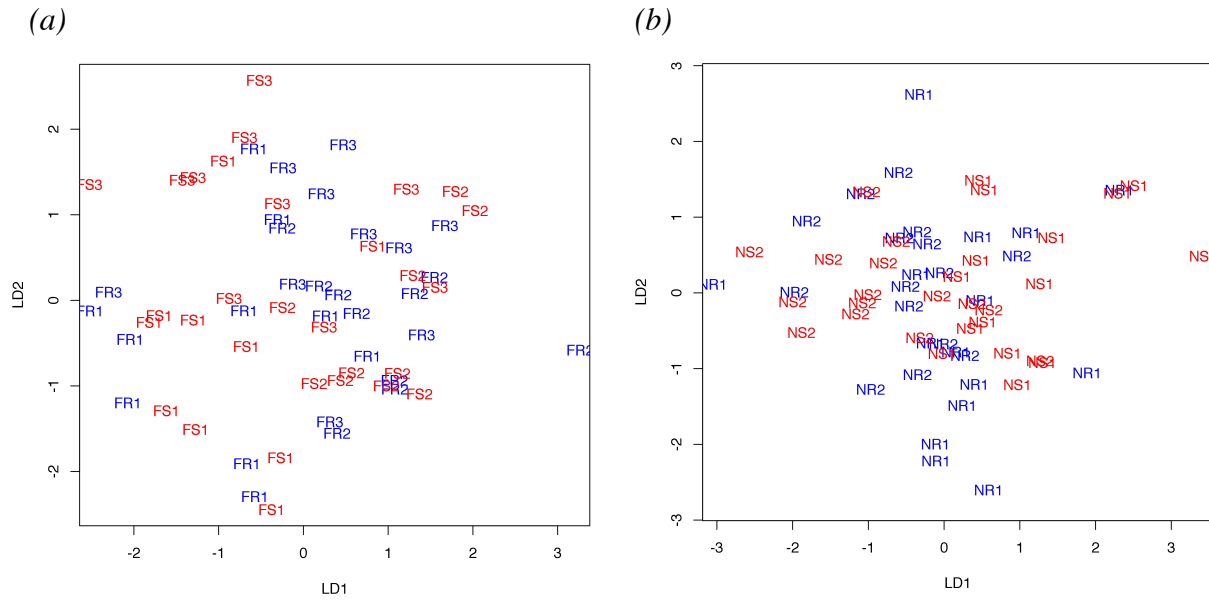

**Figure S4.** Log 2 brain expression values of *odor binding protein 4* (*obp4*) gene **(A)** among the four behavioural groups during scouting, and **(B)** across different behaviours. In (a), the *obp4* expression patterns shows an up-regulation pattern and the highest fold change between nest scouts and recruits and a moderate down-regulation in food scouts in comparison to food recruits (both experimented in the field environment, FDR<0.05, contrast  $p<0.05$ ). In (b), the *obp4* gene was up-regulated in food scouts compared to non-scouts (experiments in semi-natural enclosure), and in foragers compared to nurses. This gene was down-regulated in active foragers compared to inactive foragers during the morning (AM) and afternoon (PM), all at FDR<0.05, contrast  $p<0.005$  level. *Obp4* was also found to be significantly down-regulated (at FDR<0.05 without contrast test) in high pollen-hoarding foragers, but the fold change was very marginal.

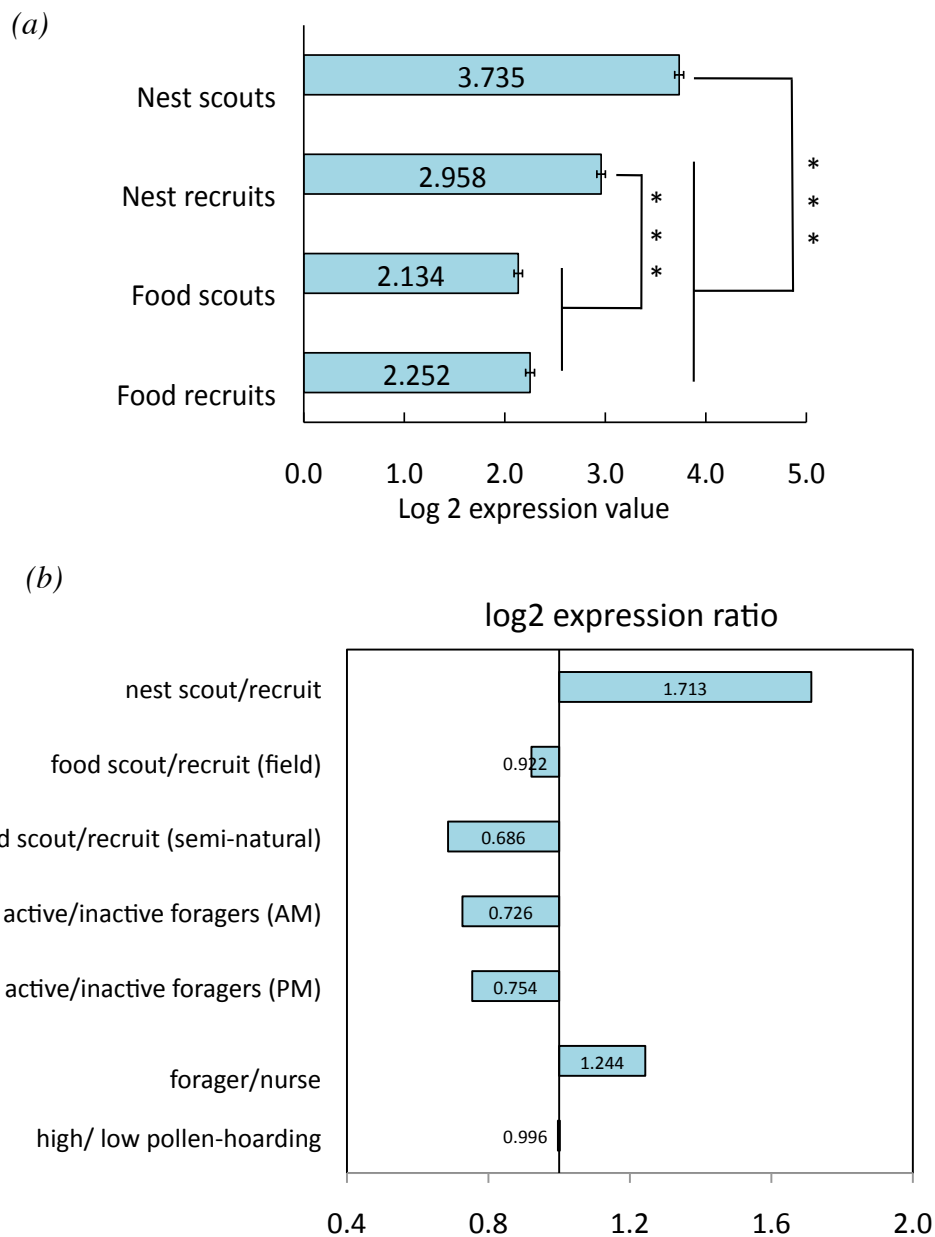

**Figure S5.** Hierarchical Clustering result was shown in heatmap for the 89 best predictor genes across the expression values of four behavioural groups (group mean). FS: food scouts, FR: food recruits, NS: nest scouts, NR: nest recruits (gene list: Table S3).

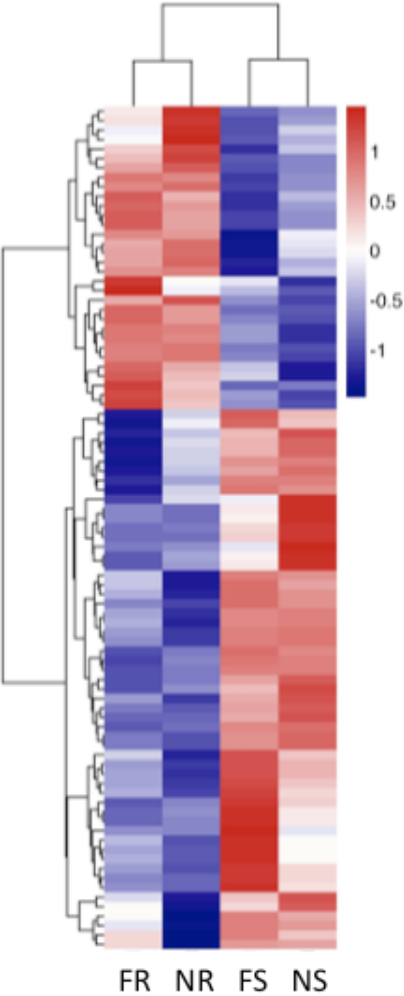



**Table S1.** Gene information for the 16 neural signaling genes studied as a part of shared molecular signatures of both types of scouting. “Functional description” based on full names of the genes (NCBI, updated 15-Aug-2013).

| Array ID          | Gene name   | GB_OGS 2.0 | GB_OGS 3.2 | Functional description                                         |
|-------------------|-------------|------------|------------|----------------------------------------------------------------|
| AM06883           | nAChRa5     | GB17254    | GB50159    | nicotinic acetylcholine receptor alpha5 subunit                |
| AM10791           | CheT-1-like | GB13547    | GB41372    | high-affinity choline transporter 1-like                       |
| AM03745           | CheT 1      | GB11121    | GB43293    | high-affinity choline transporter 1                            |
| AM01620 & AM12780 | DopR1       | GB 30031_3 | GB50192    | dopamine receptor 1                                            |
| AM10492           | DopR2       | GB17921    | GB50155    | dopamine receptor 2                                            |
| AM09330           | Gat-1b      | GB16752    | GB51198    | sodium- and chloride-dependent gaba transporter 1b             |
| AM11925           | Gat-a       | GB19372    | GB54918    | sodium- and chloride-dependent gaba transporter 1              |
| AM05627           | mGAR-B-R3   | GB13016    | GB53009    | metabotropic gamma-aminobutyric acid type b receptor subtype 3 |
| AM12526           | Gad1        | GB19979    | GB40118    | glutamate decarboxylase-like                                   |
| AM11182           | mGluR1      | GB18621    | GB44968    | metabotropic glutamate receptor 1                              |
| AM08175           | mGluR2      | GB15591    | GB44216    | metabotropic glutamate receptor 2                              |
| AM04064           | Glu-RI      | GB11443    | GB40973    | ionotropic glutamate receptor 1                                |
| AM08958           | Eaat-2      | GB16377    | GB49785    | excitatory amino acid transporter 2                            |
| AM04250           | Eaat-4      | GB11630    | GB53002    | excitatory amino acid transporter 4                            |
| AM03889           | OctR1       | GB11266    | GB52910    | octopamine receptor                                            |
| AM11426           | Oct-b-2R    | GB18869    | GB49696    | octopamine receptor beta-2R                                    |

**Table S2.** Functional analysis results for differentially expressed genes in nest scouts and food scouts, respectively, based on GO and KEGG pathway enrichment analyses, with up-regulated and down-regulated genes are tested separately. (Tab label: GOenrich\_Nest\_UP, Nest\_down, GOenrich\_Food-UP, Food\_down). The spreadsheets also includes GO analysis results for differentially expressed genes in two main effects: role and contexts, and their interaction, respectively (Table label: GOenrich\_Role\_UP, Role\_down, GOenrich\_Context\_UP, Context\_down, GOenrich\_interaction). Enrichment was determined in two ways: more stringent test is a hypogeometric test with Benjamini-FDR<0.05, which results heighted in blue; or a EASE score with p-value <0.05, which analysis showed in Fig. 1b were based. CC: cellular component; MF: molecular function; BP: biological process. (Detailed description of this GO analysis is in the Materials and Methods).

**An Excel spreadsheet named “Table S2\_GO enrichment data.xlsx” is provided as a separate file and a part of the electronic supplementary material.**

**Table S3.** Hormone signaling gene expression in (a) food scouting behaviour, (b) nest scouting behaviour. \* Significant for “task” and “interaction”, but not for “role”, despite both significant in food and nest scouting. (c) Hormone signaling genes that were significant for effect of “role” between scouts and recruits (samples were pooled from both food and nest contexts, so here the expression patterns were an overall pattern across Table S3 A and B) \*\* Significant for the interaction between “role” and “context”.

(a) foraging:

| Array probe | GB number (OGS 2.0) | Gene name                                                                      | Expression pattern |
|-------------|---------------------|--------------------------------------------------------------------------------|--------------------|
| 08021       | 30298               | Ecdysone receptor (EcR), transcription variation 1                             | Scout down         |
| 08226       | 17814               | Hormone receptor-like 38, CG1864 *<br>(probable nuclear hormone receptor hr38) | Scout down         |
| 09450       | 16873               | Ftz transcription factor 1, CG4059, loc726450                                  | Scout up           |

(b) nest-hunting:

| Array probe | GB number (OGS 2.0) | Gene name                                                                      | Expression pattern |
|-------------|---------------------|--------------------------------------------------------------------------------|--------------------|
| 09226       | 16648               | Ultraspiracle Protein (USP), CG4380                                            | Scout up           |
| 03985       | 11364               | Ecdysone-induced protein 75, CG8127                                            | Scout up           |
| 03986       | 11364               | Ecdysone-induced protein 75, CG8127                                            | Scout up           |
| 03987       | 11364               | Ecdysone-induced protein 75, CG8127                                            | Scout up           |
| 10132       | 16648               | DopEcR, isoform A. loc413040                                                   | Scout up           |
| 03384       | 17814               | Ecdysone-regulated gene E74                                                    | Scout up           |
| 08226       | 17814               | Hormone receptor-like 38, CG1864 *<br>(probable nuclear hormone receptor hr38) | Scout up           |
| 09450       | 16873               | Ftz transcription factor 1, CG4059, loc726450                                  | Scout up           |
| 06669       | 30150               | Broad-complex (Br-c), CG11491                                                  | Scout up           |

(c) role:

| Array probe | GB number (OGS 2.0) | Gene name                                        | Expression pattern |
|-------------|---------------------|--------------------------------------------------|--------------------|
| 09226       | 16648               | Ultraspiracle Protein (USP), CG4380 **           | Scout up           |
| 03144       | 17330               | Juvenile hormone acid methyltransferase, CG17330 | Scout down         |
| 03985       | 11364               | Ecdysone-induced protein 75, CG8127 **           | Scout up           |
| 03986       | 11364               | Ecdysone-induced protein 75, CG8127**            | Scout up           |
| 10132       | 16648               | DopEcR, isoform A. loc413040 **                  | Scout up           |
| 09450       | 16873               | Ftz transcription factor 1, CG4059, loc726450    | Scout up           |
| 06669       | 30150               | Broad-complex (Br-c), CG11491 **                 | Scout up           |

**Table S4.** Class prediction results using uncorrelated shrunken centroid (USC) method. (a) Best predictor genes selected from 557 “role-only” genes. Delta and rho are user-selected parameters. Gene lists from delta=0.5 are subsets of delta=0, and within each delta value, the selected gene number increases while smaller gene lists are the subsets of the larger gene lists. (b) Cross-context class prediction results, testing how well the identifier genes best for predicting food scouts and recruits predict nest scouts and recruits and *vice versa*. USC: delta=0, rho=0 was used for both tests in the table. *P* value with an asterisk denotes significance ( $p < 0.005$ ).

(a)

| USC: delta=0              | rho=0.5 | rho=0.6 | rho=0.7 | rho=0.8 | rho=1 | no selection |
|---------------------------|---------|---------|---------|---------|-------|--------------|
| no. of predictor genes    | 89      | 167     | 302     | 428     | 509   | 557          |
| no. of correct prediction | 111     | 110     | 110     | 109     | 108   | 94           |
| % of correct prediction   | 92.5 %  | 91.7%   | 91.7%   | 90.8%   | 90.0% | 78.3%        |
| USC: delta=0.5            | rho=0.5 | rho=0.6 | rho=0.7 | rho=0.8 | rho=1 |              |
| no. of predictor genes    | 81      | 145     | 247     | 325     | 371   |              |
| no. of correct prediction | 110     | 111     | 111     | 108     | 106   |              |
| % of correct prediction   | 91.7%   | 92.5%   | 92.5%   | 90.0%   | 88.3% |              |

(b)

| significant gene set       | training individual profiles | no. of best identifier genes (% of correct prediction) | testing individual profiles  | no. of correct prediction | binomial test <i>p</i> value |
|----------------------------|------------------------------|--------------------------------------------------------|------------------------------|---------------------------|------------------------------|
| food scouting (1003 genes) | 30 food scouts & 30 recruits | 95 genes (95%)                                         | 30 nest scouts & 30 recruits | 31/60 bees (58%)          | 0.449                        |
| nest scouting (1032 genes) | 30 nest scouts & 30 recruits | 108 genes (95%)                                        | 30 food scouts & 30 recruits | 39/60 bees (65%)          | 0.0134 *                     |

**Table S5.** Gene ID and annotation of 89 best predictor genes in OGS 3.2. Dmel\_r5.42 are the up-to-date gene annotation in *Drosophila* genome (by May 2012). #N/A: not available in gene annotations or *Drosophila* orthologs. (Bold font: 16 transcripts currently have no gene information, thus have all #N/A except Probe IDs).

| Probe ID | GB Number OGS3.2 | Gene Names                                                           | Dmel_r5.42_Gene_ID | Dmel_r5.42_Name          |
|----------|------------------|----------------------------------------------------------------------|--------------------|--------------------------|
| AM06501R | GB54890          | kynurenine 3-monooxygenase                                           | FBgn0000337        | cn-PA                    |
| AM11801  | GB46713          | elongation factor 2                                                  | FBgn0000559        | Ef2b-PA                  |
| AM12505  | GB42011          | follicle cell protein 3c-1                                           | FBgn0000644        | Fcp3C-PA                 |
| AM07018  | GB48999          | transcription factor ap-4                                            | FBgn0001994        | crp-PA                   |
| AM02905  | GB44133          | tubulin beta-1 chain                                                 | FBgn0003889        | betaTub85D-PA            |
| AM12856R | GB54085          | #N/A                                                                 | FBgn0004828        | His3.3B-PA               |
| AM04761  | GB49031          | ribosomal protein s18                                                | FBgn0010411        | RpS18-PB                 |
| AM08533  | GB42312          | mitochondrial isoform 1                                              | FBgn0024891        | ferrochelatase-PA        |
| AM03767  | GB40778          | udp-n-acetylglucosamine transporter                                  | FBgn0024994        | Csat-PB                  |
| AM10675  | GB52717          | #N/A                                                                 | FBgn0025709        | CG8083-PA                |
| AM10502  | GB43265          | equilibrative nucleoside transporter 1-like isoform 1                | FBgn0026585        | Ent2-PA                  |
| AM04357  | GB43719          | alpha-catulin-like isoform 3                                         | FBgn0029105        | alpha-catenin-related-PA |
| AM10585  | GB43117          | nucleoside diphosphate-linked moiety x motif mitochondrial-like      | FBgn0030528        | CG11095-PA               |
| AM07719  | GB44686          | adp-ribosylation factor-like protein 16-like                         | FBgn0031254        | CG13692-PA               |
| AM05627  | GB53009          | gamma-aminobutyric acid type b receptor subunit 2                    | FBgn0031275        | GABA-B-R3-PA             |
| AM04152  | GB52600          | uncharacterized protein loc100871763                                 | FBgn0031632        | CG15628-PA               |
| AM06376  | GB54929          | #N/A                                                                 | FBgn0032005        | Snx6-PB                  |
| AM05883  | GB43205          | uncharacterized protein loc100867964                                 | FBgn0032598        | ChLD3-PA                 |
| AM05890  | GB43379          | protease m50 membrane-bound transcription factor site 2 protease     | FBgn0033656        | S2P-PA                   |
| AM12313  | GB41602          | sugar transporter                                                    | FBgn0034045        | CG8249-PA                |
| AM02800  | GB48112          | abhydrolase domain-containing protein 16a-like                       | FBgn0035519        | CG1309-PA                |
| AM02667  | GB46008          | PREDICTED: adrenodoxin, mitochondrial-like [ <i>Apis mellifera</i> ] | FBgn0035529        | CG1319-PB                |
| AM07547  | GB55515          | inositol oxygenase-like                                              | FBgn0036262        | CG6910-PB                |

**Table S5 (cont.)**

|                |             |                                                                                                         |             |             |
|----------------|-------------|---------------------------------------------------------------------------------------------------------|-------------|-------------|
| AM10298        | GB40580     | integrator complex subunit 9                                                                            | FBgn0036570 | IntS9-PA    |
| AM06329        | GB49994     | ribosomal protein l26e                                                                                  | FBgn0036825 | RpL26-PA    |
| AM10697        | GB44936     | histone-arginine methyltransferase<br>carmer-like isoform 1                                             | FBgn0037770 | Art4-PA     |
| AM09435        | GB45806     | unc93-like protein mfsd11-like                                                                          | FBgn0038053 | CG18549-PA  |
| AM11809        | GB50572     | osiris 14                                                                                               | FBgn0040279 | Osi14-PA    |
| AM04616        | GB42671     | glypican 6                                                                                              | FBgn0041604 | dlp-PB      |
| AM02383        | GB46479     | uncharacterized protein loc100872175                                                                    | FBgn0044324 | Chro-PB     |
| AM02866        | GB42844     | guanine nucleotide exchange factor dbs                                                                  | FBgn0050440 | CG30440-PA  |
| AM08404        | GB52980     | probable g-protein coupled receptor 158                                                                 | FBgn0051195 | CG31195-PB  |
| AM10876        | GB47354     | neurotrimin- partial<br>l-aminoadipate-semialdehyde<br>dehydrogenase-phosphopantetheinyl<br>transferase | FBgn0051646 | CG31646-PA  |
| AM00120        | GB51398     | low density lipoprotein receptor-related<br>protein                                                     | FBgn0052099 | eap-PA      |
| AM06335        | GB44917     | mitochondrial import inner membrane<br>translocase subunit tim50-c-like                                 | FBgn0052432 | CG32432-PA  |
| AM12190        | GB51578     | sh2 domain-containing adapter protein f                                                                 | FBgn0250874 | ttm50-PA    |
| AM01698        | GB52172     | voltage-dependent l-type calcium<br>channel subunit beta-2-like                                         | FBgn0259109 | CG42251-PC  |
| AM09976        | GB40089     | calpain-c                                                                                               | FBgn0259822 | Ca-beta-PI  |
| AM02994        | GB42487     | #N/A                                                                                                    | FBgn0260450 | CalpC-PA    |
| AM05789        | GB43054     | gene model 996                                                                                          | FBgn0261259 | Fhos-PC     |
| AM07970        | GB47052     | forkhead box protein P                                                                                  | FBgn0261802 | CG42748-PG  |
| AM10360        | GB40150     | pyrazinamidase nicotinamidase-like                                                                      | FBgn0262477 | FoxP-PC     |
| AM03831        | GB53419     | protein lethal essential for life-like                                                                  | #N/A        | #N/A        |
| AM11223        | GB45906     | #N/A                                                                                                    | #N/A        | #N/A        |
| AM11755        | GB55300     | #N/A                                                                                                    | #N/A        | #N/A        |
| AM06799        | GB43761     | uncharacterized protein loc100866401                                                                    | #N/A        | #N/A        |
| AM08113        | GB44455     | poor imd response upon knock-in                                                                         | #N/A        | #N/A        |
| AM02267        | GB51435     | #N/A                                                                                                    | #N/A        | #N/A        |
| <b>AM01635</b> | <b>#N/A</b> | <b>#N/A</b>                                                                                             | <b>#N/A</b> | <b>#N/A</b> |
| AM09485        | GB54184     | bridging integrator 3 homolog                                                                           | #N/A        | #N/A        |
| <b>AM00574</b> | <b>#N/A</b> | <b>#N/A</b>                                                                                             | <b>#N/A</b> | <b>#N/A</b> |
| <b>AM01504</b> | <b>#N/A</b> | <b>#N/A</b>                                                                                             | <b>#N/A</b> | <b>#N/A</b> |
| <b>AM02307</b> | <b>#N/A</b> | <b>#N/A</b>                                                                                             | <b>#N/A</b> | <b>#N/A</b> |
| AM09723        | GB48133     | l-lactate dehydrogenase a-like 6a-like                                                                  | #N/A        | #N/A        |
| <b>AM01423</b> | <b>#N/A</b> | <b>#N/A</b>                                                                                             | <b>#N/A</b> | <b>#N/A</b> |
| AM00665        | GB50486     | #N/A                                                                                                    | #N/A        | #N/A        |
| AM03859        | GB41579     | neuronal calcium sensor 2                                                                               | #N/A        | #N/A        |
| <b>AM02126</b> | <b>#N/A</b> | <b>#N/A</b>                                                                                             | <b>#N/A</b> | <b>#N/A</b> |
| AM05033        | GB49828     | zinc finger cchc-type and rna-binding<br>motif-containing protein 1-like                                | #N/A        | #N/A        |
| AM06506        | GB50674     | uncharacterized protein loc100879076                                                                    | #N/A        | #N/A        |
| AM03212        | GB43788     | enhancer of split mgamma                                                                                | #N/A        | #N/A        |
| AM07265        | GB53750     | upf0454 protein c12orf49 homolog                                                                        | #N/A        | #N/A        |
| AM04631        | GB40086     | sodium-dependent multivitamin<br>transporter                                                            | #N/A        | #N/A        |
| AM02964        | GB50124     | protein bv8                                                                                             | #N/A        | #N/A        |
| AM05101        | GB52845     | sh3 and cysteine-rich domain-containing<br>protein 2                                                    | #N/A        | #N/A        |
| AM12118        | GB41499     | tetratricopeptide repeat protein 5                                                                      | #N/A        | #N/A        |

**Table S5 (cont.)**

|                 |             |                                                           |             |             |
|-----------------|-------------|-----------------------------------------------------------|-------------|-------------|
| AM11465         | GB42877     | polyamine-modulated factor 1                              | #N/A        | #N/A        |
| AM08986         | GB44965     | selenophosphate synthetase                                | #N/A        | #N/A        |
| <b>AM02331</b>  | <b>#N/A</b> | <b>#N/A</b>                                               | <b>#N/A</b> | <b>#N/A</b> |
| AM08728         | GB45121     | #N/A                                                      | #N/A        | #N/A        |
| <b>AM00622</b>  | <b>#N/A</b> | <b>#N/A</b>                                               | <b>#N/A</b> | <b>#N/A</b> |
| <b>AM00499</b>  | <b>#N/A</b> | <b>#N/A</b>                                               | <b>#N/A</b> | <b>#N/A</b> |
| AM12175         | GB55541     | ubiquitin-conjugating enzyme e2c-binding                  | #N/A        | #N/A        |
| <b>AM12902R</b> | <b>#N/A</b> | <b>#N/A</b>                                               | <b>#N/A</b> | <b>#N/A</b> |
| <b>AM01771</b>  | <b>#N/A</b> | <b>#N/A</b>                                               | <b>#N/A</b> | <b>#N/A</b> |
| AM04023         | GB46086     | #N/A                                                      | #N/A        | #N/A        |
| AM08966         | GB50806     | #N/A                                                      | #N/A        | #N/A        |
| <b>AM01678</b>  | <b>#N/A</b> | <b>#N/A</b>                                               | <b>#N/A</b> | <b>#N/A</b> |
| AM02799         | GB55582     | #N/A                                                      | #N/A        | #N/A        |
| <b>AM00664</b>  | <b>#N/A</b> | <b>#N/A</b>                                               | <b>#N/A</b> | <b>#N/A</b> |
| <b>AM00693</b>  | <b>#N/A</b> | <b>#N/A</b>                                               | <b>#N/A</b> | <b>#N/A</b> |
| AM07754         | GB52339     | microtubule-associated proteins 1a 1b light chain 3a-like | #N/A        | #N/A        |
| AM07930         | GB50946     | uncharacterized protein loc100869298                      | #N/A        | #N/A        |
| AM10769         | GB46912     | tudor domain-containing protein 12                        | #N/A        | #N/A        |
| AM04830         | GB50880     | uncharacterized protein loc100866375                      | #N/A        | #N/A        |
| <b>AM00646</b>  | <b>#N/A</b> | <b>#N/A</b>                                               | <b>#N/A</b> | <b>#N/A</b> |
| AM08161         | GB50625     | #N/A                                                      | #N/A        | #N/A        |
| <b>AM02489</b>  | <b>#N/A</b> | <b>#N/A</b>                                               | <b>#N/A</b> | <b>#N/A</b> |
| AM03598         | GB54137     | transcription factor with ap2 domain                      | #N/A        | #N/A        |
